# Supplementary material
Source: PubMed Central journal article supplement (PMC7218798)
Supplement: NIHMS1574023-supplement-Suppl_Figures.pdf [file NIHMS1574023-supplement-Suppl_Figures.pdf]

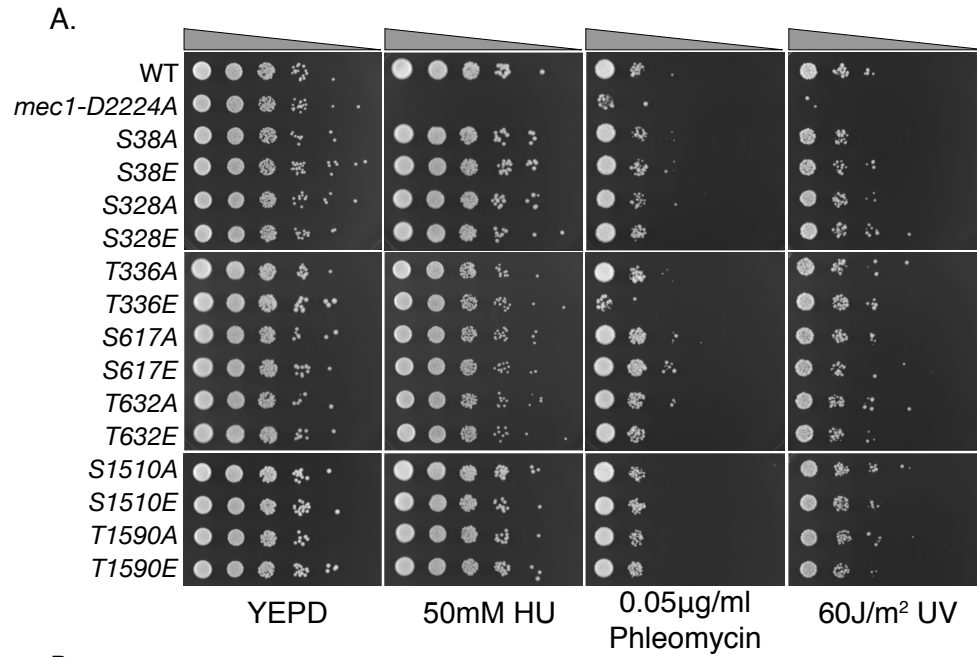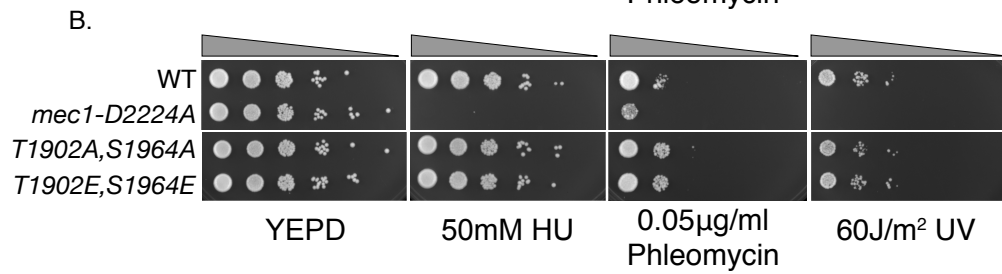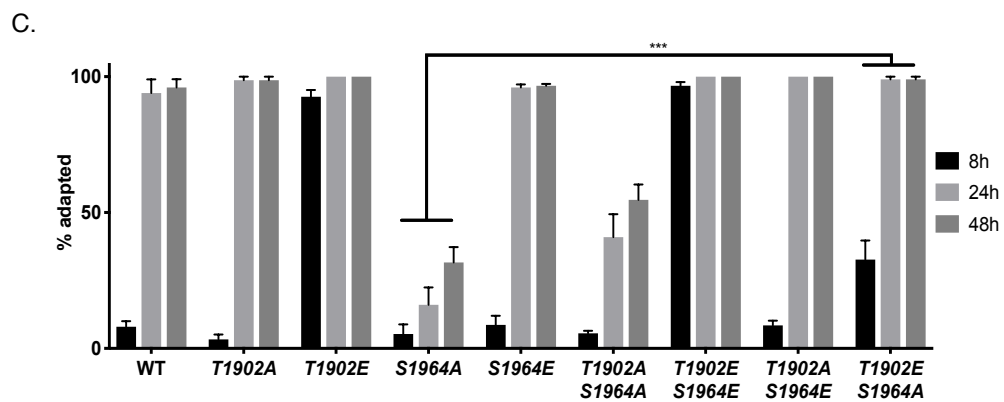

**Figure Supplement 1. (Related to Figure 1).**

**A.** Sensitivity of Mec1 SQ/TQ mutants and kinase-dead *mec1-D2224A* to DNA damaging reagents, HU, phleomycin and UV. The WT and *mec1-D2224A* control results also appear on Figure 2B, because all Mec1 SQ/TQ mutants have been screened for drug sensitivity side by side by using the same control strains. **B.** Sensitivity of *mec1-T1902A,S1964A* and *mec1-T1902E,S1964E* mutants to DNA damaging reagents HU, phleomycin and UV. **C.** Cell cycle arrest and adaptation in Mec1 T1902 and S1964 single and double mutants measured by adaptation assay. Error bars represent SEM. \*\*\*  $p < 0.001$ .

A.

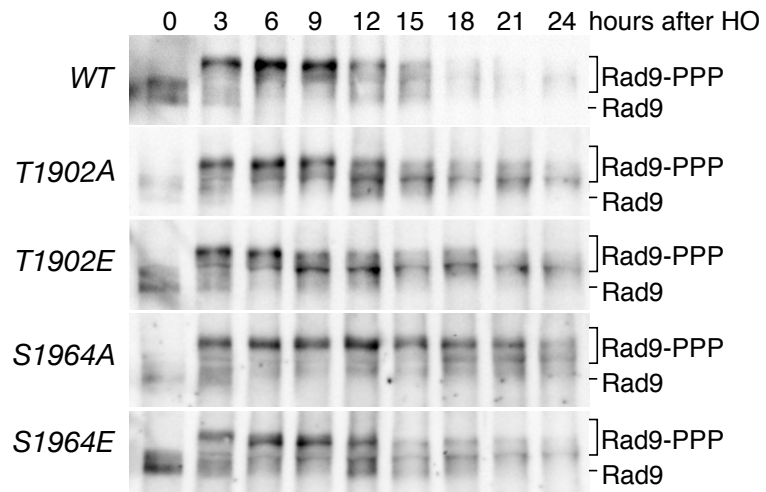

B.

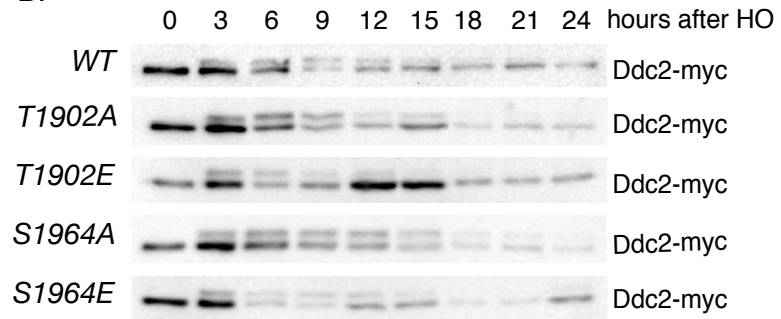

**Figure Supplement 2. (Related to Figure 1).**

**A.** Rad9 phosphorylation in Mec1 T1902 and S1964 site mutants following a single DSB. Samples were collected as previously described and blotted for Rad9. **B.** Ddc2 phosphorylation in Mec1 T1902 and S1964 site mutants following a single DSB. Samples were blotted for myc for the detection of Ddc2-myc.

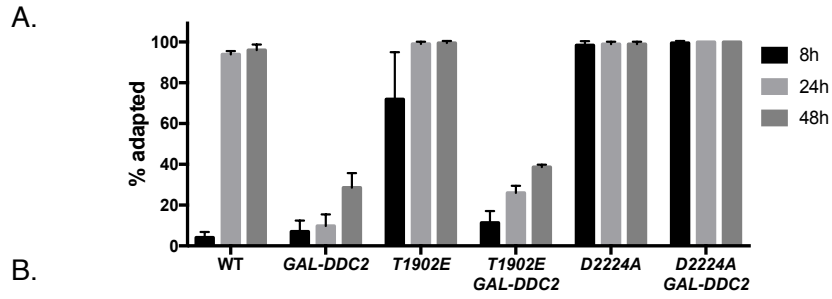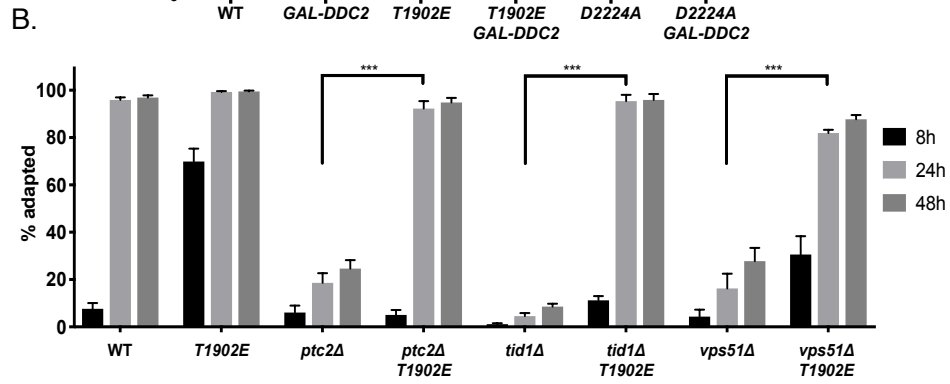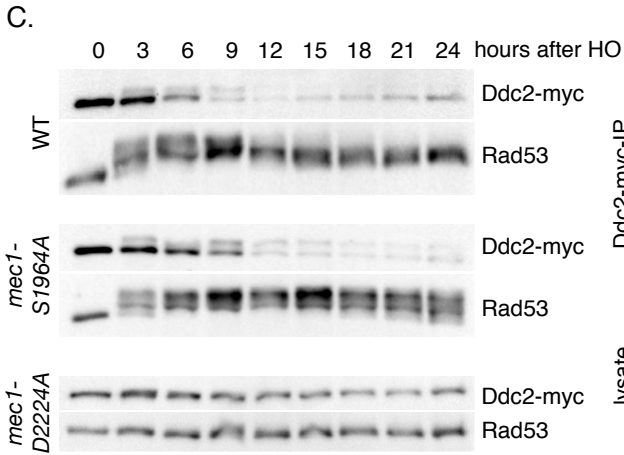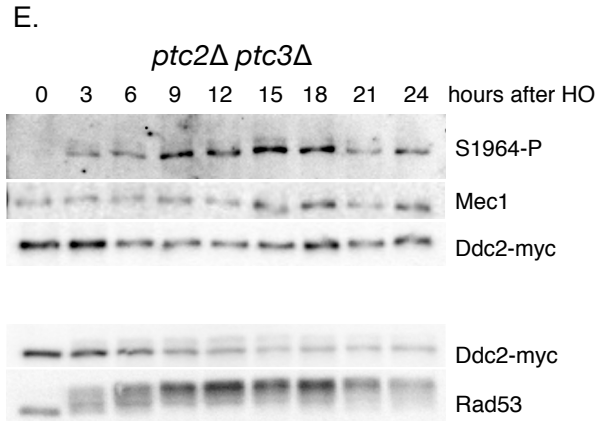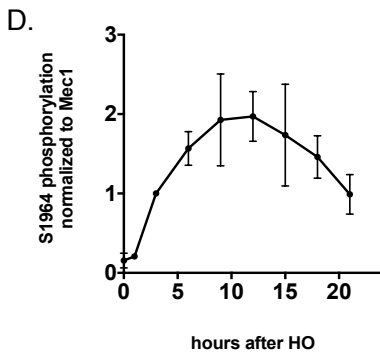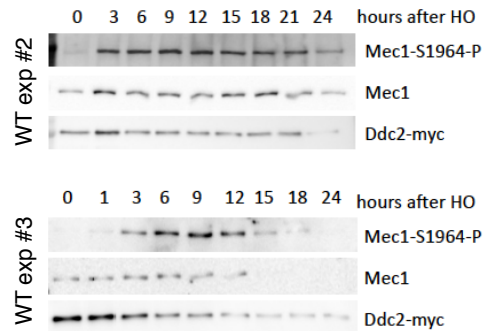

**Figure Supplement 3. (Related to Figure 3).**

**A.** Cell cycle arrest and adaptation in WT and *mec1-T1902E* strains after *GAL-DDC2* overexpression determined by adaptation assay. Error bars represent SEM. **B.** Cell cycle arrest and adaptation in WT, *ptc2* $\Delta$ , *tid1* $\Delta$ , *vps51* $\Delta$  and *mec1-T1902E* double mutants. Error bars represent SEM. \*\*\*  $p < 0.001$ . **C.** Ddc2 and Rad53 hyperphosphorylation in WT, *mec1-D2224A* and *mec1-S1964A* mutants following the induction of a DSB. Cell lysate samples were collected side by side with the pulldown samples (Figure 3B) and blotted for myc to infer the phosphorylation status of Ddc2, and for Rad53. **D.** Mec1-S1964 phosphorylation following a DSB normalized to Mec1 protein levels after Ddc2-myc immunoprecipitation from 3 independent experiments. Also see Figure 3B for the rest of the raw data used for this quantification. See Figure 3C for Mec1-S1964 phosphorylation normalized to Ddc2 protein levels. **E.** Mec1-S1964 phosphorylation in the *ptc2* $\Delta$  *ptc3* $\Delta$  strain following the induction of a DSB, after Ddc2-myc immunoprecipitation. Samples collected from the cell lysates simultaneously were blotted for Rad53 and Ddc2.

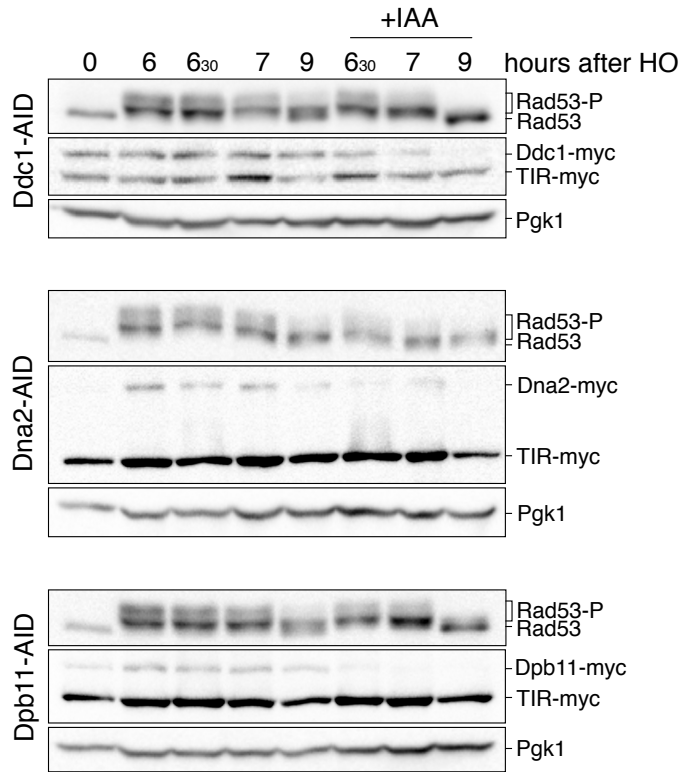

**Figure Supplement 4. (Related to Figure 4).**

Cultures of Ddc1-AID-myc, Dpb11-AID-myc or Dna2-AID-myc were grown, and DNA damage was induced at 0h by the addition of galactose. 6h later, the cultures were split into two, and one part was treated with IAA to allow the degradation of AID-tagged proteins. Samples were collected and blotted for Rad53 phosphorylation to infer checkpoint activity, for myc to confirm the degradation of the protein of interest, for TIR1 and Pgk1 as a loading control.



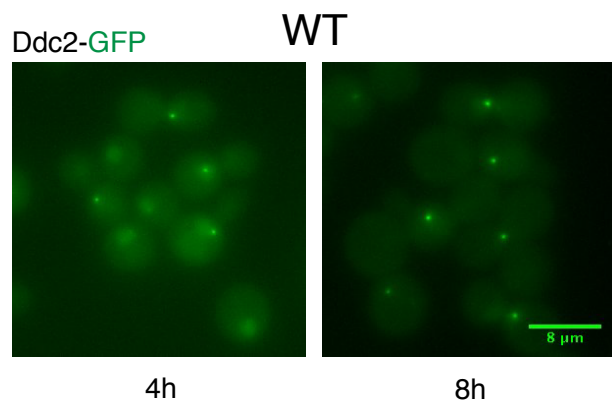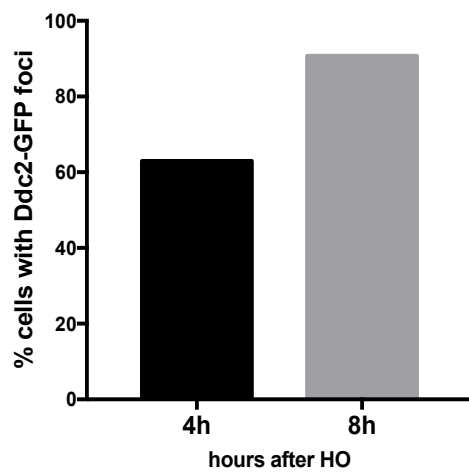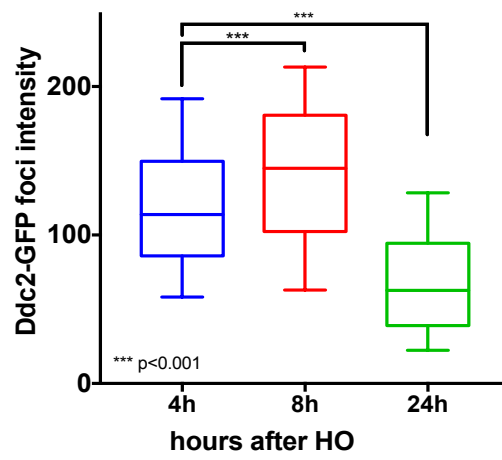

**Figure Supplement 5. (Related to Figure 5)**

Ddc2-GFP localization in WT strain, 4h and 8h after the induction of a single DSB. The intensity of the Ddc2-GFP signal and the percentage of the cells that show detectible foci were quantified for more than 300 cells. The 8h and 24h quantifications shown here for comparison with 4h time point data also appear on Figure 5A and Figure 5C, as all these experiments were carried out simultaneously. For the Ddc2-GFP foci intensity quantification, error bars represent 10-90% of the data set. \*\*\*  $p < 0.001$ .



**Figure Supplement 6 (Related to Figure 5 and 6).**

**A.** Ddc2 and Rad53 phosphorylation following a single DSB in *ddc2-S173A,S182A* and *ddc2-S173E,S182E* mutants. Samples were blotted for Rad53, and for myc, for the detection of Ddc2-myc. **B.** MS<sup>2</sup> spectra for the Ddc2 S173 and S182 phosphopeptides. For the full list of the peptides, see SI Table 6. **C.** Ddc2 abundance in WT and *atg1Δ* strains after the induction of a single DSB. Error bars represent SEM. Ddc2 abundance in *atg1Δ* was quantified from two independent experiments. **D.** Ddc2 abundance in *ddc2-S173A,S182A* and *ddc2-S173E,S182E* mutants following a DSB. Error bars represent SEM. Ddc2 abundance in *ddc2-S173A,S182A* and *ddc2-S173E,S182E* strains was quantified from two independent experiments.

**SI Table 1.** Plasmids used in this study. Related to Star Methods.

|        |                                                                     |
|--------|---------------------------------------------------------------------|
| bRA89  | [pPGK1::CaCas9::HPHMX BpII]                                         |
| bRA90  | [pPGK1::CaCas9::LeuMX BpII]                                         |
| pKH41  | [pMEC1::Leu2]                                                       |
| pGM009 | bRA90 targeting CACGGATCCATCTTCTTCTC (to mutate Mec1 S38)           |
| pGM010 | bRA90 targeting ACCACTTCCAATTGACCAG (to mutate Mec1 S328)           |
| pGM011 | bRA90 targeting TTATTAGTCAACTGCGTGAA (to mutate Mec1 T336)          |
| pGM012 | bRA90 targeting ACAATCTCAAAAATTGCCAG (to mutate Mec1 S617 and T632) |
| pGM014 | bRA90 targeting TAATGGATCCTCGTTTGAGA (to mutate Mec1 T1590)         |
| pGM015 | bRA90 targeting AGCATTGTCCCACTTATATT (to mutate Mec1 T1902)         |
| pGM016 | bRA90 targeting GCACTAGAACTAGATCATG (to mutate Mec1 S1964)          |
| pGM020 | bRA90 targeting ATACATAGACTTTAGCATCC (to mutate Mec1 S1510)         |
| pGM021 | bRA90 targeting GTTGCCATATATTAGGTCT (to mutate Mec1 D2224)          |
| pGM024 | bRA90 targeting TTAGTCACAAAAAGTCCCTG (to delete Vps51 ORF)          |
| pGM032 | bRA89 targeting GCACTAGAACTAGATCATG (to mutate Mec1 S1964)          |
| pGM033 | [pMEC1-S1964A::LEU2]                                                |

|        |                                                                   |
|--------|-------------------------------------------------------------------|
| pGM047 | bRA89 targeting AACTACTGGGAAAACATTCG (to mutate Rad53 K227A)      |
| pGM048 | bRA90 targeting AACTACTGGGAAAACATTCG (to mutate Rad53 K227A)      |
| pGM053 | bRA89 targeting ATAATCCTATTTGGGTTTAG (to mutate Ddc2 S182)        |
| pGM054 | bRA90 targeting ATAATCCTATTTGGGTTTAG (to mutate Ddc2 S182)        |
| pGM055 | bRA89 targeting ATTGCAACTGAGGACGAATC (to mutate Ddc2 S173)        |
| pGM056 | bRA90 targeting ATTGCAACTGAGGACGAATC (to mutate Ddc2 S173)        |
| pGM059 | bRA89 targeting GTTTGTAATGCTGCTGATGA (to mutate Ddc2 T29 and T40) |
| pGM060 | bRA90 targeting GTTTGTAATGCTGCTGATGA (to mutate Ddc2 T29 or T40)  |
| pGM061 | bRA89 targeting TCCATAGTGACATAATCAAT (to mutate Ddc2 S636)        |
| pGM062 | bRA90 targeting TCCATAGTGACATAATCAAT (to mutate Ddc2 S636)        |
| pGM069 | bRA90 targeting ATTGGTGCTAGAGGTTACAC (to delete Arg5,6 ORF)       |
| pGM070 | bRA90 targeting AATGGAAGGCTAGAAGCGCA (to delete Arg5,6 ORF)       |

**SI Table 2.** The ssDNA templates used in this study for CRISPR/Cas9-mediated gene targeting. Related to Star Methods.

|                            |                                                                                                          |
|----------------------------|----------------------------------------------------------------------------------------------------------|
| GM74<br>(for Mec1 S38A)    | GGTGCAGATTA AAAAAGT GCCCTCGGATCCATCTTCTGCTCAGGAGTACGCCAAGAGTTAAAGATCCTGAACACCCTCA                        |
| GM75<br>(for Mec1 S38E)    | GGTGCAGATTA AAAAAGT GCCCACGGATCCATCTTCTGAACAGGAGTACGCCAAGAGTTAAAGATCCTGAACACCCTCA                        |
| GM78<br>(for Mec1 S328A)   | CTCAAAATGCTTTGTAGACCACTTTCTATCGACCAGTGGGCAGATTTTGCTCAAAGTGAACATTTTCCGTTACGCAGT                           |
| GM79<br>(for Mec1 S328E)   | CTCAAAATGCTTTGTAGACCACTTTCTATCGACCAGTGGGCAGATTTTGAACAAAGTGAACATTT TCCGTTACGCAGT                          |
| GM82<br>(for Mec1 T336A)   | GTGGGCAGATTTTTCACAAAGTGAACATTTTCCGTTGCTCAGTTGACTAATAAAGCTCTCTCGATTGTATATTTGATT                           |
| GM83<br>(for Mec1 T336E)   | GTGGGCAGATTTTTCACAAAGTGAACATTTTCCGTTGCAACAGTTGACTAATAAAGCTCTCTCGATTGTATATTTGATT                          |
| GM86<br>(for Mec1 S617A)   | AAGATGAACACACTGCCACGCTGATAAAGTTTCTACAAGCTCAAAAATTACCAGTAGTGAAAGAAAATTTAGTCATTGCT                         |
| GM87<br>(for Mec1 S617E)   | AAGATGAACACACTGCCACGCTGATAAAGTTTCTACAAGAACAAAATTACCAGTAGTGAAAGAAAATTTAGTCATTGCT                          |
| GM88<br>(for Mec1 T632A)   | AAGTTTCTACAATCTCAAAAGTTACCTGTAGTGAAAGAAAATTTAGTCATTGCTTGGGCTCAATTAACATTGACGACT<br>TCTAATGATGTATTTGATACAC |
| GM89<br>(for Mec1 T632E)   | AAGTTTCTACAATCTCAAAAGTTACCTGTAGTGAAAGAAAATTTAGTCATTGCTTGGGAACAATTAACATTGACGACT<br>TCTAATGATGTATTTGATACAC |
| GM96<br>(for Mec1 T1590A)  | TATTGCGAAAGCTTTAATTGCAATATCTAATGAGGATCCATTAAGGGCTCAAAAATACATCCACAATTCCTTTAGGCTTA                         |
| GM97<br>(for Mec1 T1590E)  | TATTGCGAAAGCTTTAATTGCAATATCTAATGAGGATCCATTAAGGGAACAAAATACATCCACAATTCCTTTAGGCTTA                          |
| GM100<br>(for Mec1 T1902A) | GAAGCGCTGCAGCATTGTCCGACATACATTTGGTACTTTGTTTTGGCTCAGTTGTTATCTAGGTTATTACATTCTCATCA                         |
| GM101<br>(for Mec1 T1902E) | GAAGCGCTGCAGCATTGTCCGACATACATTTGGTACTTTGTTTTGGAACAGTTGTTATCTAGGTTATTACATTCTCATCA                         |
| GM104<br>(for Mec1 S1964A) | GCATATTTTAGAAAAGTATAGACAACATGCTCAAAATCCTCATGATCTGGTTTCATCCGCATTGGATTTAACGAAAGCAT                         |
| GM105<br>(for Mec1 S1964E) | GCATATTTTAGAAAAGTATAGACAACATGAACAAAATCCTCATGATCTGGTTTCATCCGCATTGGATTTAACGAAAGCAT                         |
| GM184<br>(for Mec1 S1510A) | GACCCAAAAC TACAACAAGGATGCTTAAGTCAATGTATGACCACCAATTGTATGCTCAAATAATATCGAACTCTTCGTT                         |
| GM185<br>(for Mec1 S1510E) | GACCCAAAAC TACAACAAGGATGCTTAAGTCAATGTATGACCACCAATTGTATGAACAAATAATATCGAACTCTTCGTT                         |
| GM189<br>(for Mec1 D2224A) | AGATCTTACGCCGTCATGGCAATGGTTGGACATATCTTGGGTCTTGGTGCTAGGCACTGTGAAAACATATTACTAGATAT                         |

|                                |                                                                                   |
|--------------------------------|-----------------------------------------------------------------------------------|
| GM333<br>(for Mec1 Q1903N)     | GAAGCGCTGCAGCATTGTCCGACATACATTTGGTACTTTGTTTTGACTAATTTGTTATCTAGGTTATTACATTCTCATCA  |
| GM334<br>(for Mec1 Q1964N)     | GCATATTTTAGAAAAGTATAGACAACATTCGAATAATCCTCATGATCTGGTTTCATCCGCATTGGATTTAACGAAAGCAT  |
| GM337<br>(for Rad53 K227A)     | AAGAAAGCCATTGAAAGAACTACTGGGAAAACTTTGCGGTGGCTATTATAAGTAAACGCAAAGTAATAGGCAATATGGA   |
| GM356<br>(for Ddc2 S182A)      | AAAAAACGTAAGATAGCTGATAATTTACTGAAAAAAAATATGGTTCCCTTAACCCAAATCGTATTATCCCGATGAAAC    |
| GM357<br>(for Ddc2 S182E)      | AAAAAACGTAAGATAGAAGATAATTTACTGAAAAAAAATATGGTTCCCTTAACCCAAATCGTATTATCCCGATGAAAC    |
| GM359<br>(for Mec1 T1902D)     | GAAGCGCTGCAGCATTGTCCGACATACATTTGGTACTTTGTTTTGGATCAGTTGTTATCTAGGTTATTACATTCTCATCA  |
| GM360<br>(for Mec1 S1964D)     | GCATATTTTAGAAAAGTATAGACAACATGATCAAAATCCTCATGATCTGGTTTCATCCGCATTGGATTTAACGAAAGCAT  |
| GM380<br>(for Ddc2 T29A)       | GAATTAGGCACCAGGCCTCCAAGGTTTGCTCAAATACCGCCATCATCAGCCGCCTTGCAAACACAAATCCCACTACTTT   |
| GM381<br>(for Ddc2 T29E)       | GAATTAGGCACCAGGCCTCCAAGGTTTGAACAAATACCGCCATCATCAGCCGCCTTGCAAACACAAATCCCACTACTTT   |
| GM384<br>(for Ddc2 T40A)       | CCTCCAAGGTTTACTCAAATACCGCCATCATCAGCCGCCTTGCAAGCTCAAATCCCACTACTTTGGAGGTTACAACGAC   |
| GM385<br>(for Ddc2 T40E)       | CCTCCAAGGTTTACTCAAATACCGCCATCATCAGCCGCCTTGCAAGAACAAATCCCACTACTTTGGAGGTTACAACGAC   |
| GM388<br>(for Ddc2 S636A)      | CAATTGCGTGAAGAACAAATCAAGCAGGTAGAAGCTCAATTAATTATGTCACTATGGAGGTTTCTCGTATGCCAAACCGA  |
| GM389<br>(for Ddc2 S636E)      | CAATTGCGTGAAGAACAAATCAAGCAGGTAGAAGAACAATTAATTATGTCACTATGGAGGTTTCTCGTATGCCAAACCGA  |
| GM404<br>(for Ddc2 T29A, T40A) | TTAGGCACCAGGCCTCCAAGGTTTGCTCAAATACCGCCATCATCAGCCGCCTTGCAAGCTCAAATCCCACTACTTTGGA   |
| GM405<br>(for Ddc2 T29E, T40E) | TTAGGCACCAGGCCTCCAAGGTTTGAACAAATACCGCCATCATCAGCCGCCTTGCAAGAACAAATCCCACTACTTTGGA   |
| GM426<br>(to delete Arg5,6)    | AGAAAAGAGAGATCTGAAGTGAGAAATAAGTCTGCATCATTTCACTGTGTATAGTAGATCTGCAGCTCAGTCACATGAGAC |
